# Supplementary material for: Efficient π bridges based on five-membered heterocyclic rings for second-order NLO properties of push-pull type molecules
Source: Royal Society of Chemistry journal article supplement (doi:10.1039/c2jm16282b), 2012-01-01
Supplement: c2jm16282b.pdf [file c2jm16282b.pdf]

## Electronic supplementary information (ESI)

### Efficient $\pi$ Bridges Base on Five-membered Heterocyclic for Second-order NLO Property of the Push-pull Type Molecules

Yan Ji <sup>\*</sup>, Ying Qian, Wei Lu

*School of Chemistry and Chemical Engineering, Southeast University,  
Nanjing 211189; China*

#### 1 Dipole moment ( $\mu$ ) and energy

The table 1 list the dipole moment and energy of the molecules M1~M16 and MZ-1~MZ16. The dipole moments ( $\mu$ ) are from 5.231 Debye (M-12) to 17.663 Debye (M-5). When compared the N,N-dimethylaniline group (Rd1) and triphenylamine group (Rd2), the  $\mu$  of molecules (M-1~M-8 and MZ-1~MZ-8) are larger than the  $\mu$  of molecules (M-9~M16 and MZ-9~MZ-16). These can show the giving electronic capability of Rd1 is larger than that of Rd2. To compare with the 2-(3-cyano-4,5,5-trimethylfuran-2-ylidene)malononitrile group (TCF Ra2) and benzonitrile group (Ra1), the  $\mu$  of molecules (M-1~M-4, M-9~M-12; MZ-1~MZ-4, MZ-9~MZ-12) are smaller than the  $\mu$  of molecules (M-5~M-8, M-13~M-16; MZ-5~MZ-8, MZ-13~MZ-16) that show the Ra2 is a high pulling electronic group. These due to the TCF group is a stronger electronic acceptor than benzonitrile group.

When considered the five-membered heterocyclic p- $\pi$  conjugated bridge, the X atoms are O, S, NH, and PH respectively. The  $\mu$  of heterocyclic contribution did not have the regular rules with the changing of the X atoms.

**ESI-Table1.** the dipole moment( $\mu$ ) and energy of designed molecules.

| $\mu$<br>(Debye) | TOTAL $E$<br>(EV) | HOMO<br>(EV) | LUMO<br>(EV) | $\mu$<br>(Debye) | TOTAL $E$<br>(EV) | HOMO<br>(EV) | LUMO<br>(EV) |        |        |
|------------------|-------------------|--------------|--------------|------------------|-------------------|--------------|--------------|--------|--------|
| M-1              | 7.272             | -3463.831    | -8.025       | -1.129           | MZ-1              | 8.768        | -3550.262    | -8.492 | -1.345 |
| M-2              | 7.965             | -3347.280    | -8.179       | -1.016           | MZ-2              | 9.046        | -3433.464    | -8.432 | -1.508 |
| M-3              | 8.086             | -3366.089    | -8.091       | -0.857           | MZ-3              | 10.164       | -3452.313    | -8.507 | -0.876 |
| M-4              | 6.946             | -3329.119    | -8.130       | -0.822           | MZ-4              | 9.287        | -3415.358    | -8.317 | -1.379 |
| M-5              | 17.663            | -4507.219    | -8.438       | -2.269           | MZ-5              | 10.777       | -4593.541    | -8.691 | -2.594 |
| M-6              | 17.255            | -4390.654    | -8.484       | -2.265           | MZ-6              | 14.076       | -4476.773    | -8.643 | -2.558 |
| M-7              | 13.986            | -4409.512    | -8.435       | -2.161           | MZ-7              | 12.288       | -4495.624    | -8.642 | -2.482 |
| M-8              | 16.081            | -4372.473    | -8.356       | -2.198           | MZ-8              | 14.809       | -4458.687    | -8.592 | -2.457 |
| M-9              | 5.650             | -4741.509    | -8.066       | -1.075           | MZ-9              | 7.441        | -4827.904    | -8.396 | -1.434 |
| M-10             | 5.718             | -4624.958    | -8.110       | -1.163           | MZ-10             | 7.614        | -4711.109    | -8.326 | -1.624 |
| M-11             | 5.705             | -4643.759    | -8.057       | -0.912           | MZ-11             | 9.022        | -4729.961    | -8.367 | -0.905 |
| M-12             | 5.231             | -4606.809    | -8.051       | -0.889           | MZ-12             | 6.867        | -4693.018    | -8.231 | -1.535 |
| M-13             | 12.726            | -5784.844    | -8.272       | -2.330           | MZ-13             | 10.002       | -5871.167    | -8.582 | -2.642 |
| M-14             | 15.359            | -5668.310    | -8.371       | -2.344           | MZ-14             | 16.952       | -5754.360    | -8.544 | -2.578 |
| M-15             | 13.541            | -5687.167    | -8.334       | -2.226           | MZ-15             | 11.153       | -5773.258    | -8.497 | -2.535 |
| M-16             | 13.733            | -5650.164    | -8.274       | -2.270           | MZ-16             | 13.548       | -5736.321    | -8.482 | -2.514 |

The total energy decreased along about the order number of molecules from 1 to 16 except some molecules (M-5, M-13, MZ-5, and MZ-13). Compared the contribution of groups for energy decreasing are  $Rd2 > Rd1$ ;  $Ra2 > Ra1$ ;  $X1 > X3 > X2 > X4$ . As shown from the order, the O atom can decrease the energy of molecules to make the molecules more stable. Compared the HOMO and LUMO energy, the Ra2 can decrease the energy of molecules more than that of Ra1. The contribution of Rd1 and Rd2 to the HOMO and LUMO energy is seemingly same. The energy of M groups are larger than that of MZ groups that show the heterocyclic bridge with three heteroatom is more stable than one heteroatom bridge. The lowest energy molecule is MZ-13, which due to the Rd2 has N atom and three-phenyl cyclic to forming the large p- $\pi$  conjugated system.

## 2 Polarizability

The polarizabilities ( $\alpha$ ) of molecules (M-1~M-16 and MZ-1~MZ-16) are listed on the table 2. Compared the  $\alpha_{average}$ , the  $\alpha$  values of molecules (M-9~M-16) are larger than that of molecules (M-1~M-8); and the  $\alpha$  of molecules (MZ-9~MZ-16) are larger than that of molecules (MZ-1~MZ-8). These can show the group Rd2 increase the  $\alpha$  values of molecules larger than group Rd1; and the group Ra2 can increase the  $\alpha$  of molecules larger than group Ra1, which can show the large conjugated system can increase the  $\alpha$  values of molecules.

Compared the different X atom of the heterocyclic bridge, the result show the  $\alpha$  values of molecules (M-1~M-16) have the order of  $S \approx PH > O \approx NH$ ; and the  $\alpha$  of molecules (MZ-1~MZ-16) have the order of  $PH \approx S > O \approx NH$ . These shows the S atom and P atom can help to enhance the  $\alpha$  values of molecules. From the table 2, the  $\alpha$  of group M are larger than that of group MZ, which show the molecules with the one-heteroatom bridge have the larger  $\alpha$  values than that of three-heteroatom bridge. The molecule M-14 gives the  $\alpha_{max}$  (572.724a.u.).

**ESI-Table 2.** The polarizabilities (a.u.) of designed molecules.

|      | $\alpha_{xx}$ | $\alpha_{yy}$ | $\alpha_{zz}$ | $\alpha_{average}$ |       | $\alpha_{xx}$ | $\alpha_{yy}$ | $\alpha_{zz}$ | $\alpha_{average}$ |
|------|---------------|---------------|---------------|--------------------|-------|---------------|---------------|---------------|--------------------|
| M-1  | 491.653       | 317.282       | 143.639       | 317.525            | MZ-1  | 466.720       | 273.299       | 151.631       | 297.217            |
| M-2  | 526.747       | 301.968       | 178.524       | 335.746            | MZ-2  | 550.469       | 285.965       | 158.327       | 331.587            |
| M-3  | 489.078       | 274.013       | 178.304       | 313.798            | MZ-3  | 478.986       | 247.785       | 153.842       | 293.538            |
| M-4  | 505.335       | 276.180       | 198.977       | 326.831            | MZ-4  | 582.080       | 260.872       | 172.798       | 338.583            |
| M-5  | 749.814       | 340.887       | 180.467       | 423.723            | MZ-5  | 546.144       | 408.808       | 173.764       | 376.239            |
| M-6  | 756.879       | 364.034       | 204.849       | 441.921            | MZ-6  | 684.467       | 396.695       | 183.681       | 421.614            |
| M-7  | 624.653       | 407.669       | 202.382       | 411.568            | MZ-7  | 593.226       | 384.332       | 181.534       | 386.364            |
| M-8  | 652.055       | 397.016       | 222.424       | 423.832            | MZ-8  | 702.365       | 375.487       | 197.630       | 425.161            |
| M-9  | 608.028       | 437.987       | 258.833       | 434.949            | MZ-9  | 605.172       | 399.110       | 261.859       | 422.047            |
| M-10 | 709.044       | 453.800       | 264.746       | 475.863            | MZ-10 | 723.264       | 428.674       | 251.895       | 467.944            |
| M-11 | 664.168       | 407.553       | 256.701       | 442.807            | MZ-11 | 577.995       | 380.710       | 284.939       | 414.548            |
| M-12 | 641.094       | 437.014       | 271.075       | 449.728            | MZ-12 | 721.394       | 389.389       | 278.826       | 463.203            |
| M-13 | 697.355       | 583.773       | 284.979       | 522.036            | MZ-13 | 678.191       | 543.527       | 277.977       | 499.898            |
| M-14 | 919.464       | 514.122       | 284.585       | 572.724            | MZ-14 | 908.950       | 492.470       | 286.259       | 562.560            |
| M-15 | 753.398       | 567.924       | 278.048       | 533.123            | MZ-15 | 738.674       | 517.994       | 288.063       | 514.910            |
| M-16 | 823.706       | 461.910       | 360.116       | 548.577            | MZ-16 | 844.272       | 506.186       | 304.295       | 551.584            |

### 3 Second-order Polarizability

**ESI-Table 3.** The second-order polarizabilities (a.u.) of designed molecules.

The calculation for  $\beta_{vec-1}$  is at a frequency of 0.00 EV (at static field quantities),

$\beta_{vec-2}$  is at 0.25EV (4959.37nm or 2016.38525  $\text{cm}^{-1}$ ),

$\beta_{vec-3}$  is at 0.50EV (2479.68 nm or 4032.77050  $\text{cm}^{-1}$ )

|      | $\beta_{vec-1}$ | $\beta_{vec-2}$ | $\beta_{vec-3}$ |       | $\beta_{vec-1}$ | $\beta_{vec-2}$ | $\beta_{vec-3}$ |
|------|-----------------|-----------------|-----------------|-------|-----------------|-----------------|-----------------|
| M-1  | 4657.027        | 4909.110        | 5829.227        | MZ-1  | 3326.659        | 3466.212        | 3950.834        |
| M-2  | 3861.663        | 4019.010        | 4564.544        | MZ-2  | 4519.817        | 4735.687        | 5502.952        |
| M-3  | 4343.073        | 4543.563        | 5250.803        | MZ-3  | 2271.965        | 2347.452        | 2601.409        |
| M-4  | 2409.036        | 2502.340        | 2824.121        | MZ-4  | 5560.220        | 5839.286        | 6835.309        |
| M-5  | 15004.307       | 16238.907       | 21118.555       | MZ-5  | 7555.772        | 7998.989        | 9627.773        |
| M-6  | 12999.309       | 13898.129       | 17344.717       | MZ-6  | 12923.899       | 13762.576       | 16924.347       |
| M-7  | 13141.464       | 14117.645       | 17902.137       | MZ-7  | 8588.356        | 9094.666        | 10952.824       |
| M-8  | 9015.785        | 9608.811        | 11840.335       | MZ-8  | 12893.374       | 13743.877       | 16933.864       |
| M-9  | 3496.536        | 3683.512        | 4363.602        | MZ-9  | 4089.641        | 4289.198        | 4999.779        |
| M-10 | 14730.528       | 15230.747       | 16925.246       | MZ-10 | 6335.391        | 6455.917        | 6822.018        |
| M-11 | 4162.340        | 4383.904        | 5181.618        | MZ-11 | 2400.766        | 2499.666        | 2843.287        |
| M-12 | 1922.946        | 2015.557        | 2344.763        | MZ-12 | 5384.769        | 5703.137        | 6868.545        |
| M-13 | 12408.405       | 13388.063       | 17263.505       | MZ-13 | 9007.949        | 9556.523        | 11590.128       |
| M-14 | 9593.435        | 10323.473       | 13208.302       | MZ-14 | 12948.929       | 13955.401       | 17844.679       |
| M-15 | 13343.343       | 14347.077       | 18243.986       | MZ-15 | 10892.898       | 11588.392       | 14183.412       |
| M-16 | 7648.632        | 8162.785        | 10095.097       | MZ-16 | 15322.562       | 16389.565       | 20437.286       |

The second-order polarizabilities ( $\beta$ ) of designed molecules at different frequency are listed in table 3. Compared the N,N-dimethylaniline group (Rd1) and triphenylamine group (Rd2) in group MZ, the molecules with Rd2 have larger  $\beta$  values than that of molecules with Rd1 except the MZ-4 and MZ-12. In the group M, the molecules with Rd2 have smaller  $\beta$  values than that of molecules with Rd1 except the M-7 and M-15. The Rd1 group can enhance the  $\beta$  values of molecules with one-heteroatom bridge, the Rd2 group can enhance the  $\beta$  values of molecules with three-heteroatom bridge. Considered the Ra1 and Ra2, the molecules with Ra2 have larger  $\beta$  values than that of molecules with Ra1 except the M-10 with M-14 and MZ-10 with Mz-14, which due to 2-(3-cyano-4,5,5-trimethylfuran-2-ylidene) malononitrile group (TCF Ra2) is a better electronic acceptor than benzonitrile group (Ra1). Considered the frequency, the  $\beta$  values enhanced with the increasing of the frequency ( $\beta_{vec}$  at 0.50EV >  $\beta_{vec}$  at 0.25EV >  $\beta_{vec}$  at 0.00 EV).
